# Supplementary material for: Retinol Binding Protein, Sunlight Hours, and the Influenza Virus-Specific Immune Response
Source: MDPI journal article supplement (doi:10.3390/biomedicines10092322), 2022-09-19
Supplement: s1 [file s1]

| Table S1. Participant Characteristics |                         |                          |        |     |       |                           |                       |             |                      |
|---------------------------------------|-------------------------|--------------------------|--------|-----|-------|---------------------------|-----------------------|-------------|----------------------|
| ID                                    | Enroll-<br>ment<br>Year | Enroll-<br>ment<br>Month | sex    | age | race  | Retinol<br>( $\mu$ mol/L) | RBP<br>( $\mu$ mol/L) | RBP/retinol | Vitamin D<br>(ng/ml) |
| FV013                                 | 2016                    | Sept                     | Female | 8   | White | 1.10                      | 1.22                  | 1.11        | 40.3                 |
| FV014                                 | 2016                    | Oct                      | Male   | 7   | Black | 1.42                      | 0.93                  | 0.66        | 25.7                 |
| FV015                                 | 2016                    | Oct                      | Male   | 2   | Black | 0.89                      | 0.87                  | 0.98        | 40.8                 |
| FV016                                 | 2016                    | Oct                      | Male   | 5   | Black | 1.42                      | 1.37                  | 0.96        | 20.5                 |
| FV017                                 | 2016                    | Oct                      | Male   | 7   | Black | 1.49                      | 1.03                  | 0.69        | 17.8                 |
| FV019                                 | 2016                    | Oct                      | Male   | 3   | Black | 0.61                      | 0.69                  | 1.13        | 17.5                 |
| FV020                                 | 2016                    | Oct                      | Female | 5   | Black | 1.17                      | 1.33                  | 1.13        | 19.9                 |
| FV021                                 | 2016                    | Oct                      | Female | 2   | Black | 1.17                      | 1.06                  | 0.91        | 24.4                 |
| FV022                                 | 2016                    | Oct                      | Male   | 2   | White | 1.14                      | 1.06                  | 0.93        | 32.1                 |
| FV023                                 | 2016                    | Nov                      | Male   | 4   | Black | 1.36                      | 1.18                  | 0.87        | 38.1                 |
| FV024                                 | 2016                    | Nov                      | Female | 4   | Black | 1.21                      | 1.01                  | 0.83        | 32.9                 |
| FV025                                 | 2016                    | Nov                      | Female | 8   | Black | 1.46                      | 1.33                  | 0.91        | 26.4                 |
| FV026                                 | 2016                    | Nov                      | Female | 8   | Black | 1.30                      | 1.28                  | 0.98        | 31.1                 |
| FV027                                 | 2016                    | Nov                      | Male   | 3   | Black | 1.21                      | 0.98                  | 0.81        | 43.4                 |
| FV028                                 | 2016                    | Nov                      | Female | 8   | White | 1.59                      | 1.48                  | 0.93        | 33.1                 |
| FV029                                 | 2016                    | Nov                      | Female | 5   | White | 1.28                      | 1.33                  | 1.04        | 35.7                 |
| FV030                                 | 2016                    | Nov                      | Female | 8   | White | 1.31                      | 0.76                  | 0.58        | 35.1                 |
| FV031                                 | 2016                    | Nov                      | Female | 6   | White | 1.21                      | 0.84                  | 0.70        | 33.8                 |
| FV032                                 | 2016                    | Nov                      | Female | 7   | White | 0.96                      | 0.77                  | 0.80        | 30.6                 |
| FV033                                 | 2016                    | Nov                      | Male   | 2   | White | 1.15                      | 0.97                  | 0.85        | 33.9                 |
| FV034                                 | 2016                    | Nov                      | Female | 3   | White | 1.06                      | 0.92                  | 0.87        | 47.9                 |
| FV035                                 | 2016                    | Nov                      | Male   | 7   | Black | 1.29                      | 1.01                  | 0.78        | 23.6                 |
| FV036                                 | 2016                    | Dec                      | Female | 4   | Black | 1.17                      | 1.04                  | 0.89        | 18.3                 |
| FV038                                 | 2016                    | Dec                      | Female | 2   | Black | 0.63                      | 0.45                  | 0.71        | 14.3                 |
| FV039                                 | 2016                    | Dec                      | Male   | 3   | Black | 1.30                      | 0.86                  | 0.66        | 38.7                 |
| FV040                                 | 2016                    | Dec                      | Female | 5   | Black | 1.51                      | 0.96                  | 0.64        | 42.0                 |
| FV041                                 | 2016                    | Dec                      | Female | 2   | Black | 1.03                      | 0.73                  | 0.71        | 18.4                 |
| FV042                                 | 2016                    | Dec                      | Female | 8   | Black | 1.08                      | 1.10                  | 1.01        | 21.2                 |
| FV045                                 | 2017                    | Jan                      | Female | 3   | Black | 1.92                      | 1.31                  | 0.69        | 27.1                 |
| FV046                                 | 2017                    | Jan                      | Female | 4   | Black | 1.05                      | 0.86                  | 0.82        | 23.7                 |
| FV047                                 | 2017                    | Jan                      | Female | 3   | Black | 1.22                      | 1.08                  | 0.88        | 30.8                 |
| FV048                                 | 2017                    | Jan                      | Female | 8   | Black | 1.39                      | 1.27                  | 0.91        | 19.2                 |
| FV049                                 | 2017                    | Jan                      | Female | 2   | Black | 0.91                      | 0.89                  | 0.97        | 20.2                 |
| FV050                                 | 2017                    | Jan                      | Male   | 6   | Black | 1.19                      | 0.99                  | 0.83        | 16.4                 |
| FV051                                 | 2017                    | Jan                      | Male   | 4   | Black | 1.28                      | 1.09                  | 0.85        | 20.4                 |
| FV053                                 | 2017                    | Jan                      | Female | 5   | Black | 1.25                      | 1.15                  | 0.91        | 21.7                 |
| FV054                                 | 2017                    | Jan                      | Female | 6   | Black | 1.13                      | 1.04                  | 0.93        | 27.1                 |
| FV055                                 | 2017                    | Jan                      | Female | 6   | Black | 0.68                      | 0.68                  | 1.00        | 23.7                 |
| FV057                                 | 2017                    | Feb                      | Male   | 7   | White | 1.95                      | 1.52                  | 0.78        | 31.9                 |
| FV058                                 | 2017                    | Feb                      | Female | 8   | White | 1.03                      | 0.93                  | 0.90        | 31.5                 |
| FV060                                 | 2017                    | March                    | Female | 6   | Black | 1.15                      | 1.00                  | 0.87        | 16.0                 |
| FV061                                 | 2017                    | March                    | Female | 4   | White | 1.11                      | 1.03                  | 0.92        | 35.1                 |
| FV062                                 | 2017                    | March                    | Male   | 5   | White | 1.08                      | 1.15                  | 1.07        | 32.7                 |
| FV064                                 | 2017                    | March                    | Male   | 2   | Black | 1.29                      | 1.34                  | 1.04        | 43.0                 |

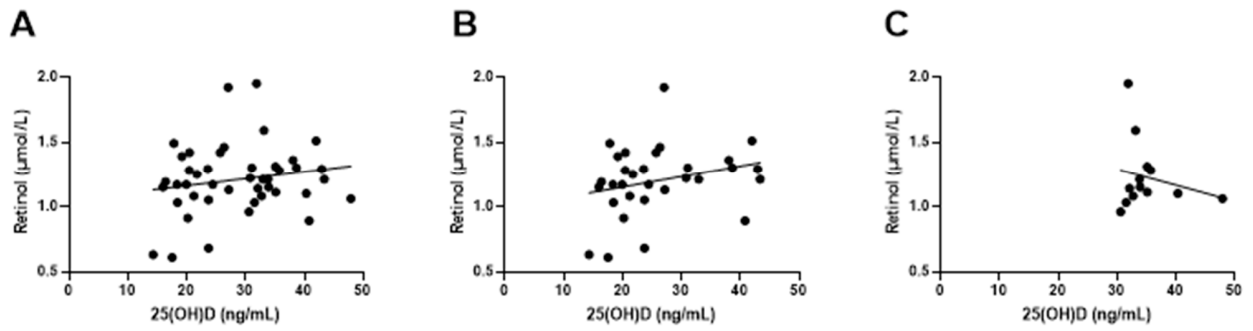

**Supplementary Figure S1.** Poor correlation between serum vitamin D and retinol levels. Each symbol represents a different study participant, comparing serum levels for 25(OH)D and retinol. Results are shown for (A) the total population (Spearman Rank Correlation  $r = 0.16$ ,  $p = 0.29$ ), (B) black children alone, and (C) white children alone.
